# Supplementary material for: The Influence of Blonanserin Supersaturation in Liquid and Silica Stabilised Self-Nanoemulsifying Drug Delivery Systems on In Vitro Solubilisation
Source: MDPI journal article supplement (doi:10.3390/pharmaceutics15010284), 2023-01-14
Supplement: s1 [file s1]

# **The Influence of Blonanserin Supersaturation in Liquid and Silica Stabilised Self- Nanoemulsifying Drug Delivery Systems on In Vitro Solubilisation**

*Amalie Møller <sup>a,b,c,\$</sup> & Hayley B. Schultz <sup>a,\$</sup>, Tahlia R. Meola <sup>a</sup>, Paul Joyce <sup>a</sup>, Anette  
Müllertz<sup>b,d</sup> & Clive A. Prestidge <sup>a,\*</sup>*

<sup>a</sup> UniSA Clinical & Health Sciences, University of South Australia, Adelaide, South  
Australia 5000, Australia

<sup>b</sup> Department of Pharmacy, Faculty of Health and Medical Sciences, University of  
Copenhagen, 2100 Copenhagen, Denmark

<sup>c</sup> Future Industries Institute, UniSA STEM, University of South Australia, Mawson  
Lakes Campus, Mawson Lakes, South Australia 5095, Australia

<sup>d</sup> Bioneer:FARMA, Department of Pharmacy, Faculty of Health and Medical  
Sciences, University of Copenhagen, 2100 Copenhagen, Denmark

\$Equal first authors

\*Corresponding Author – Email: [clive.prestidge@unisa.edu.au](mailto:clive.prestidge@unisa.edu.au). Phone: +61 8 830 22438. Postal address: UniSA Clinical & Health Sciences, University of South Australia, Adelaide, South Australia 5000, Australia

# SUPPLEMENTARY DATA

**Table S1:** The drug loading level of BLON, and the amount dose of BLON, lipid and silica of the developed super-SNEDDS for lipolysis.

| Formulation             | Drug load<br>(% of S <sub>eq</sub> ) | Amount dosed |            |             |
|-------------------------|--------------------------------------|--------------|------------|-------------|
|                         |                                      | BLON (mg)    | Lipid (mg) | Silica (mg) |
| Liquid super-SNEDDS150% | 150                                  | 2.7          | 55         | 0           |
| Liquid super-SNEDDS250% | 250                                  | 2.7          | 35         | 0           |
| Solid SNEDDS90%         | 90                                   | 2.7          | 91.3       | 96          |
| Solid super-SNEDDS150%  | 150                                  | 2.7          | 52.3       | 57          |
| Solid super-SNEDDS200%  | 200                                  | 2.7          | 37.3       | 43          |
| Solid super-SNEDDS250%  | 250                                  | 2.7          | 29.3       | 34          |
| Solid super-SNEDDS300%  | 300                                  | 2.7          | 23.3       | 29          |

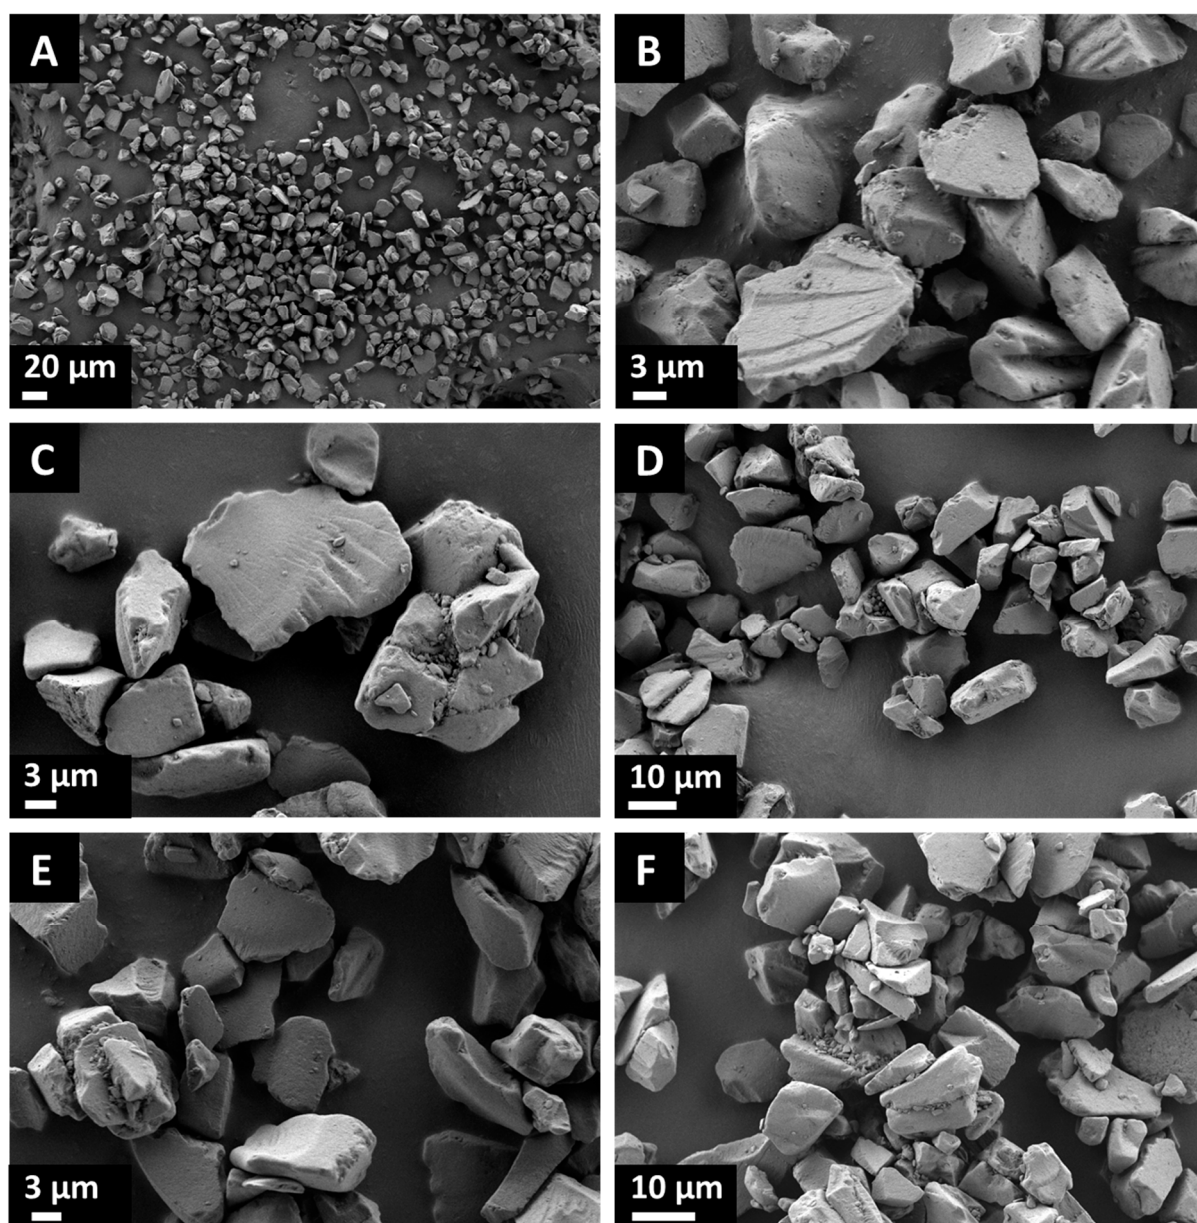

**Figure S1:** SEM images of silica carrier and solid super-SNEDDS at different drug loading levels. A) and B) mesoporous silica carrier, C) solid super-SNEDDS90%, D) solid super-SNEDDS150%, E) solid super-SNEDDS200% and F) solid super-SNEDDS250%. Data for blank mesoporous silica (A and B) and solid super-SNEDDS150% (D) was previously reported by and is published with permission from (Møller et al., 2021).

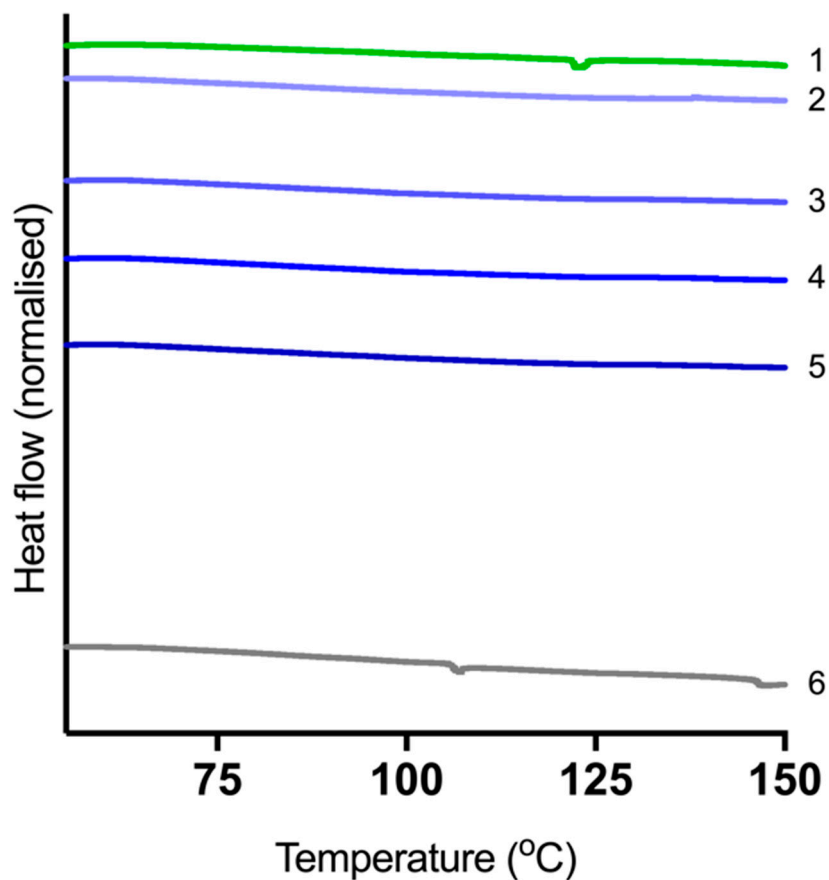

**Figure S2:** DSC thermograms of solid formulations after 22 days of storage. Endothermic down. 1) 1% physical mixture (w/w) of BLON in silica microparticles, 2) solid super-SNEDDS90%, 3) solid super-SNEDDS150%, 4) solid super-SNEDDS200%, 5) solid super-SNEDDS250% and 6) blank silica microparticles. Data for 1% physical mixture (w/w) of BLON in silica microparticles, solid super-SNEDDS150% and blank silica microparticles was previously reported by and is published with permission from (Møller et al., 2021).

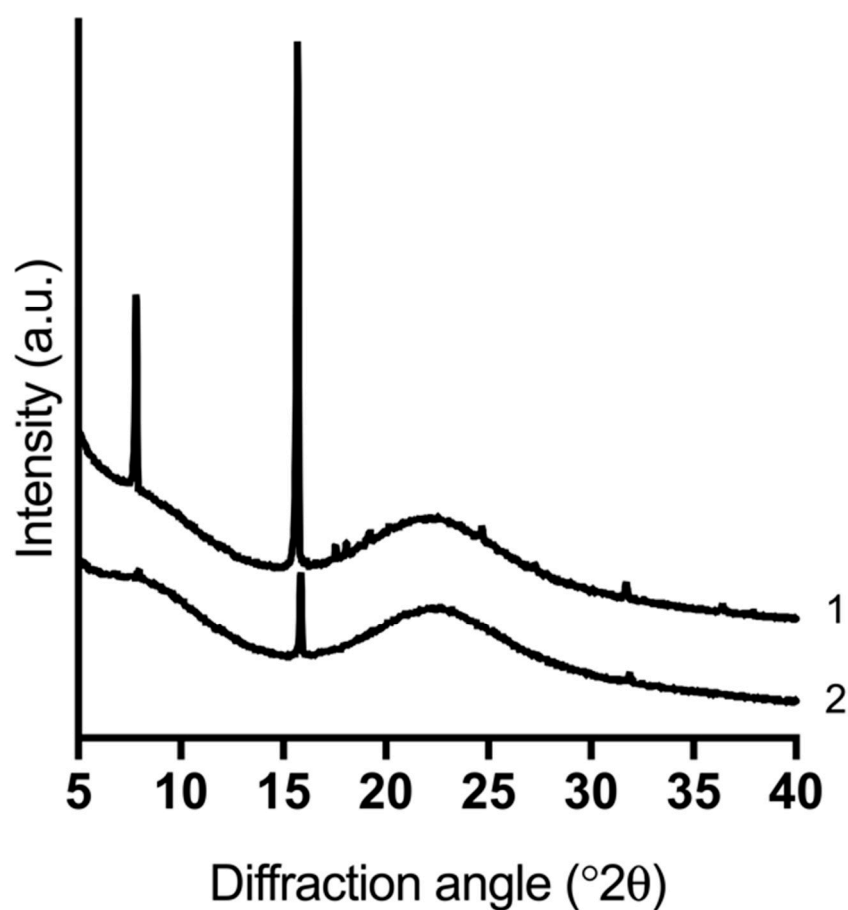

**Figure S3:** XRPD patterns for 1) 5% and 2) 1% physical mixture (w/w) of BLON in silica microparticles. Data for 5% and 1% physical mixture (w/w) of BLON in silica microparticles was previously reported by and is published with permission from (Møller et al., 2021).

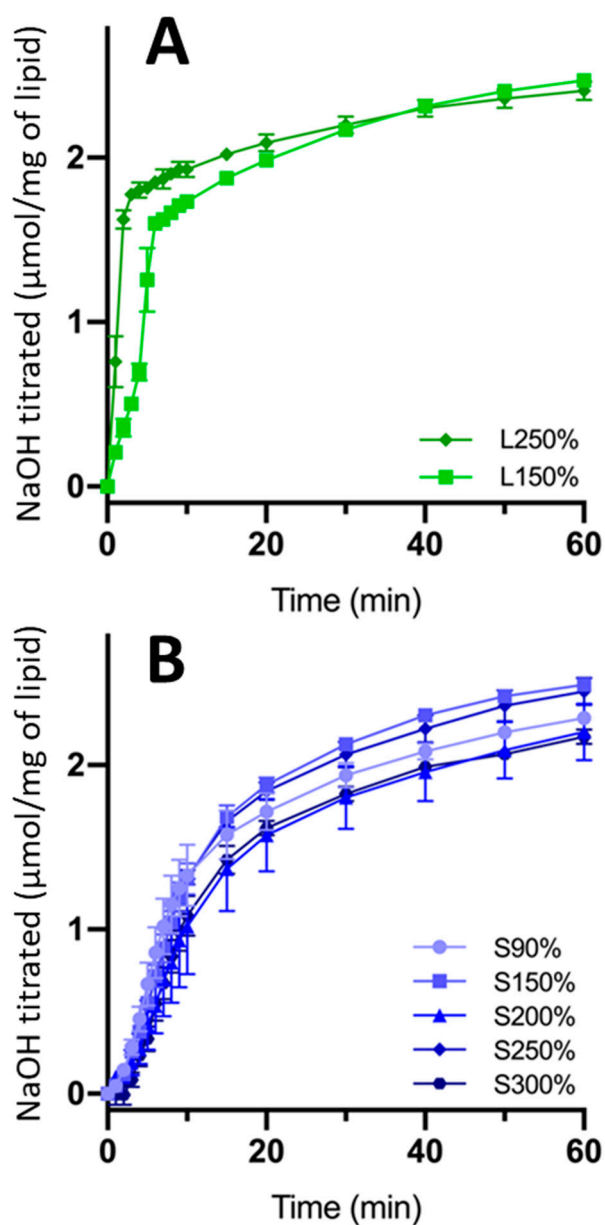

**Figure S4:** The digestion profiles (corrected for lipid amount in vessel) during *in vitro* lipolysis (pH 6.5) of liquid super-SNEDDS150% (square, light green, L150%), liquid super-SNEDDS250% (diamond, dark green, L250%), solid super-SNEDDS90%, 150%, 200%, 250% and 300% (blue, darker with increasing drug load, circle S90%, square S150%, triangle S200%, diamond S250% and octagon S300%). Each value represents the mean  $\pm$  SD,  $n = 3$ . Data for crystalline BLON, liquid super-SNEDDS150% and solid

super-SNEDDS150% was previously reported by and is published with permission from (Møller et al., 2021).

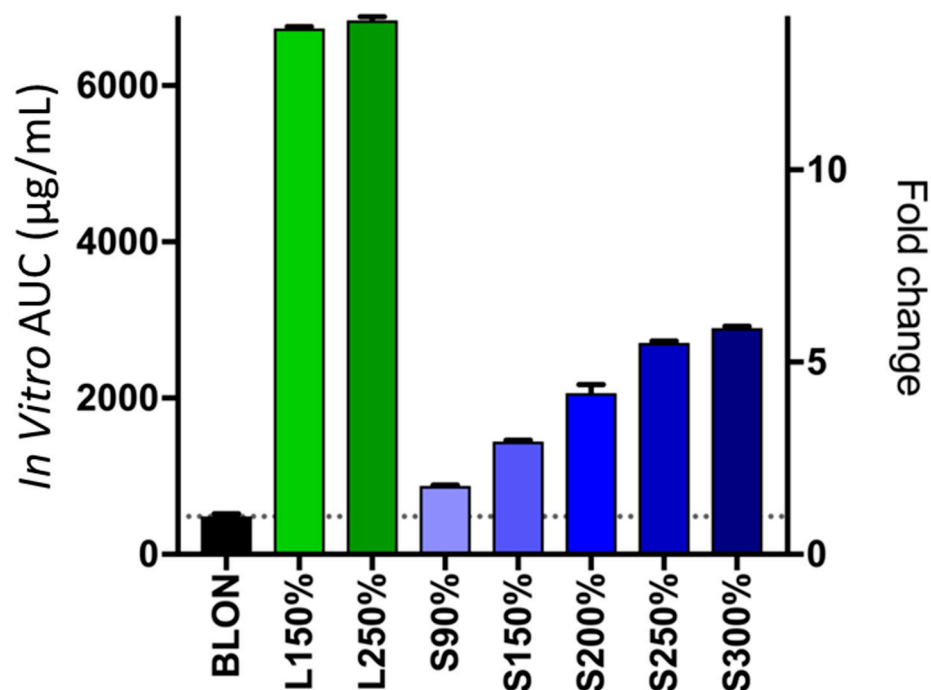

**Figure S5:** *In vitro* AUC (0-60 min) for BLON solubilisation from different formulations during lipolysis. BLON (black), liquid super-SNEDDS150% (light green), liquid super-SNEDDS250% (dark green) and solid super-SNEDDS90%, 150%, 200%, 250% and 300% (blue, darker with increasing drug load). Grey dotted line indicates AUC for pure BLON. Each value represents the mean  $\pm$  SD,  $n = 3$ . Data for crystalline BLON, liquid super-SNEDDS150% and solid super-SNEDDS150% was previously reported by and is published with permission from (Møller et al., 2021).



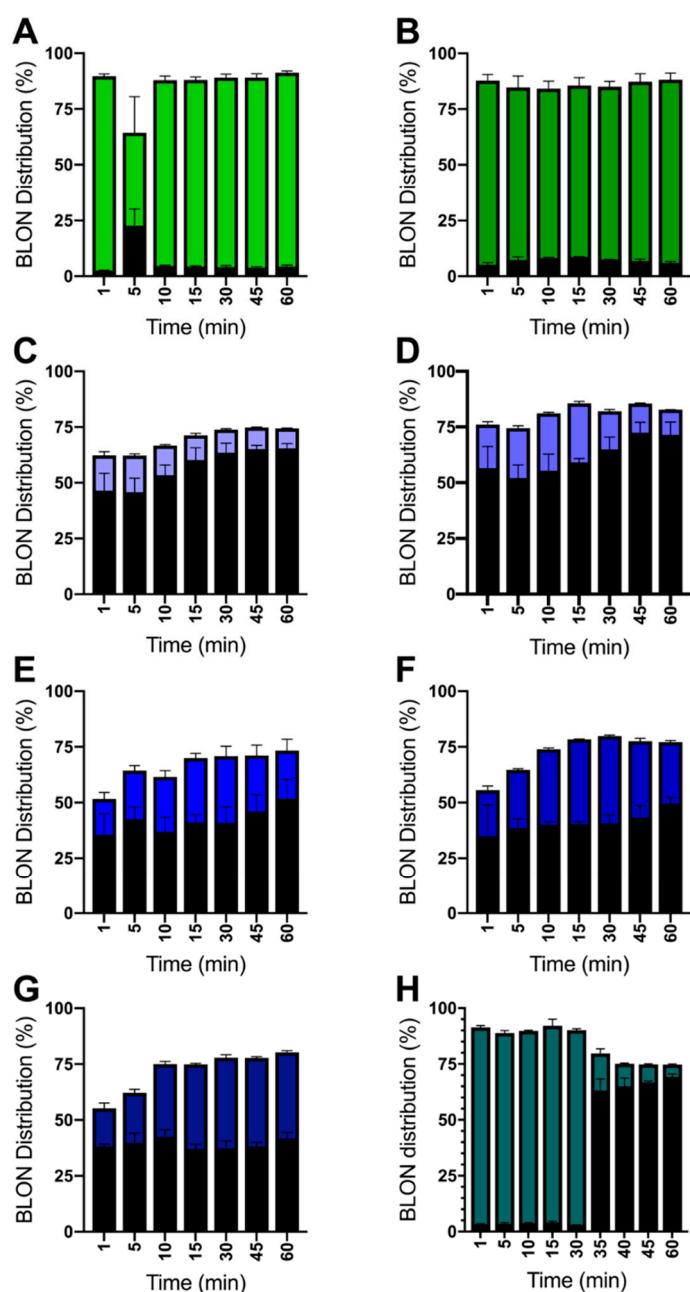

**Figure S6:** BLON distribution between aqueous (coloured) and pellet phase (black) during *in vitro* lipolysis (pH 6.5). A) liquid super-SNEDDS150%, B) liquid super-SNEDDS250%, C) solid super-SNEDDS90%, D) solid super-SNEDDS150%, E) solid super-SNEDDS200%, F) solid super-SNEDDS250%, G) solid super-SNEDDS300% and H) liquid super-SNEDDS with addition of silica microparticles after 30 min. Each value represents the mean  $\pm$  SD,  $n = 3$ . Data for liquid super-SNEDDS150% and solid

super-SNEDDS150% was previously reported by and is published with permission from (Møller et al., 2021).

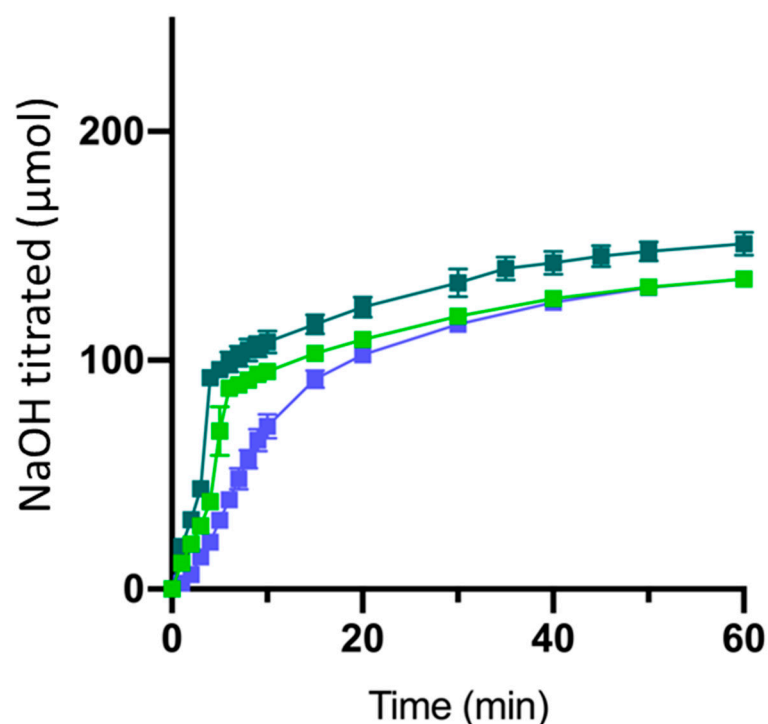

**Figure S7:** The digestion profiles during *in vitro* lipolysis (pH 6.5) of liquid super-SNEDDS150% (square, light green), solid super-SNEDDS150% (blue, square) and liquid super-SNEDDS150% with addition of silica after 30 min (teal, square). Each value represents the mean  $\pm$  SD,  $n = 3$ . Data for formulation liquid super-SNEDDS150% and solid super-SNEDDS150% were previously reported by and is published with permission from (Møller et al., 2021).

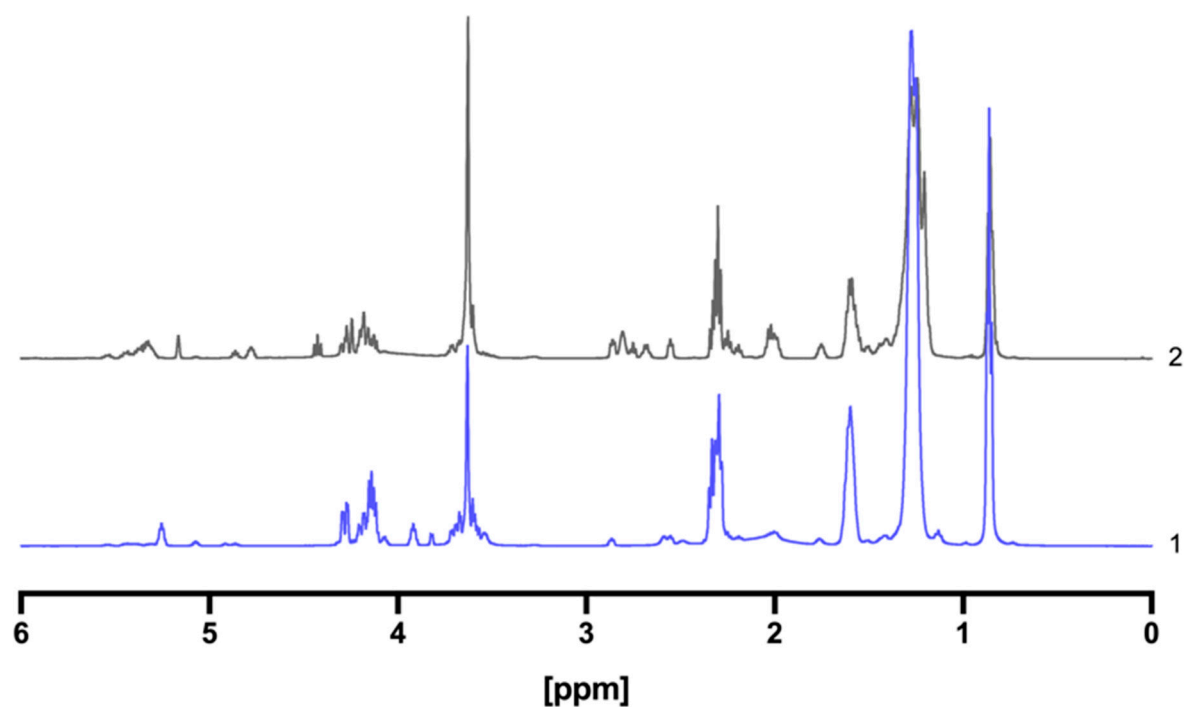

**Figure S8:** NMR spectra of 1) undigested solid super-SNEDDS150% and 2) solid super-SNEDDS150% after 60 min of lipolysis.

## References

Møller, A., Schultz, H.B., Meola, T.R., Müllertz, A., Prestidge, C.A., 2021. The Influence of Solidification on the in vitro Solubilisation of Blonanserine Loaded Supersaturated Lipid-Based Oral Formulations. *European Journal of Pharmaceutical Sciences* 157, 105640.
